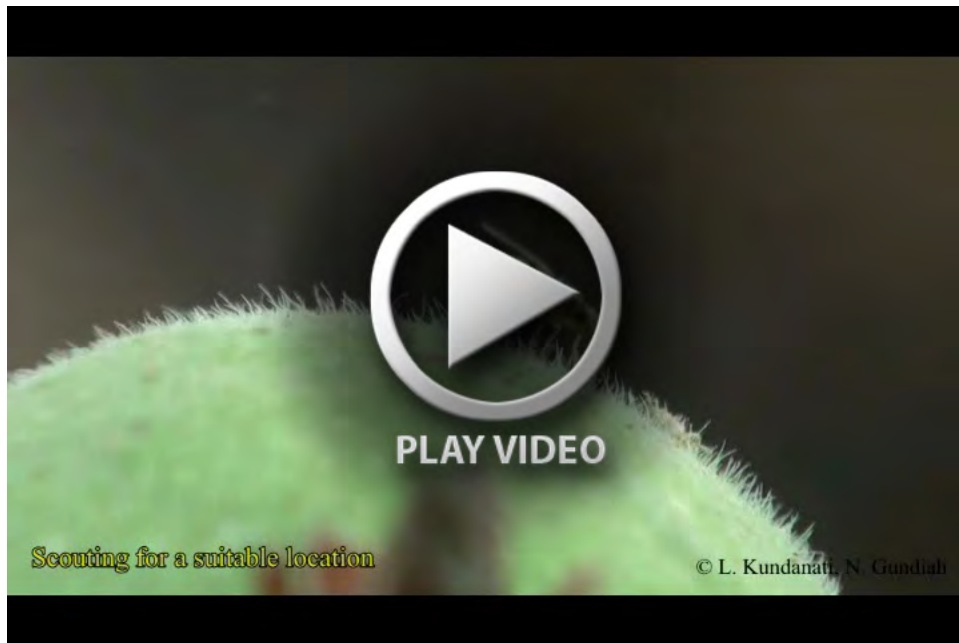

**Movie 1. Parasitoid wasp oviposition in a fig substrate.** Oviposition by parasitoid wasps presents several challenges including choice of suitable substrate, repeated boring without buckling and undergoing wear/fracture, and fast retraction to avoid predation.
